# Supplementary material for: Contrast-enhanced MRI-based intratumoral heterogeneity assessment for predicting lymph node metastasis in resectable pancreatic ductal adenocarcinoma
Source: Springer Nature journal article supplement (doi:10.1186/s13244-025-01956-0), 2025-03-30
Supplement: MOESM1 [file 13244_2025_1956_MOESM1_ESM.pdf]

# **Contrast-enhanced MRI-Based Intratumoral Heterogeneity Assessment for Predicting Lymph Node Metastasis in Resectable Pancreatic Ductal Adenocarcinoma ELECTRONIC SUPPLEMENTARY MATERIAL**

## **Appendix S1**

### **Detailed Imaging Acquisition**

All contrast-enhanced MRIs were performed using the following MRI systems: [MAGNETOM Aera, Siemens; Prisma, Siemens], [GE 3.0T Discovery MR750, Siemens Aera], [GE MEDICAL SYSTEMS SIGNA Architect, Philips Ingenia CX], and [Philips Ingenia CX 3.0T]. Gadolinium-based contrast agents, including gadolinium diethylenetriamine pentaacetic acid (Gd-DTPA; Magnevist, Bayer HealthCare), gadobenate dimeglumine (Xudong Haipu Pharmaceutical, Shanghai, China), and gadobenate dimeglumine (Beilu Pharmaceutical, Beijing, China), were intravenously injected and reached the ascending aorta. The Gd-DTPA agents were administered at a dosage of 0.1 mmol/kg, with an infusion rate of 1.0–2.0 mL/s for gadolinium diethylenetriamine pentaacetic acid (Magnevist, Bayer HealthCare), gadobenate dimeglumine (Xudong Haipu Pharmaceutical, Shanghai, China), or gadobenate dimeglumine (Beilu Pharmaceutical, Beijing, China).

Prior to MRI scans, patients were required to fast for 6–8 hours. The MRI protocol consisted of the following sequences: (a) T2-weighted imaging; (b) diffusion-weighted imaging with b values set to 0, 50, and 500 s/mm<sup>2</sup> for [MAGNETOM Aera, Siemens; Prisma, Siemens] systems, 0, 50, and 800 s/mm<sup>2</sup> for [GE MEDICAL SYSTEMS SIGNA Architect], or 0 and 800 s/mm<sup>2</sup> for [Philips Ingenia CX 3.0T; GE 3.0T Discovery MR750, Siemens Aera]. Apparent diffusion coefficient (ADC) maps were then generated using a monoexponential model. Additionally, (c) in-phase and out-of-phase T1-weighted imaging, and (d)

dynamic T1-weighted imaging were performed during the precontrast phase, arterial phase (20–30 seconds after contrast injection), portal venous phase (60–70 seconds post-injection), and delayed phase (160–180 seconds post-injection).

## Appendix S2

### Image Segmentation and image preprocessing

One radiologist (H.T.S. with 10 years of experience in abdominal imaging) delineated the tumor on each image using ITK-SNAP software (version 4.0.2; <http://www.itksnap.org>) across three cohorts. In cases where segmentation was ambiguous, another senior radiologist (M.S.Z, with 31 years of expertise in pancreatic diseases) was consulted for an expert assessment. Two months later, MR images from 30 patients were randomly selected and re-segmented by (L.L.) in a blind fashion to assess inter-observer variability. An ICC value greater than 0.80 was deemed indicative of good reproducibility.

In the aspect of image pre-processing, considering the layer thickness and the difficulty it brought to registration,  $T1_{Pre}$ ,  $T1_{Arterial}$ ,  $T1_{Venous}$ , and  $T1_{Delayed}$  sequences were utilized for clustering. To obtain a reliable habitat imaging in clinical settings, three-phase enhancement ratio mappings, including Enhanced Ratio Mapping\_arterial (Enhanced\_A), Enhanced Ratio Mapping\_venous (Enhanced\_V), Enhanced Ratio Mapping\_delayed (Enhanced\_D) were derived using the following equation:  $Enhancement\ Ratio\ Mapping = \frac{T1_{Enhanced} - T1_{Pre}}{T1_{Pre}}$ .

The arterial phase is considered the most prominent contrast-enhanced phase for tumor depiction. Consequently, the remaining phases,  $T1_{Pre-contrast}$ ,  $T1_{Venous}$ , and  $T1_{Delayed}$  were aligned to  $T1_{Arterial}$  through SyN transform using the open-source Python registration package ANTsPy.

## Appendix S3

### Habitat Imaging and Radiomic Feature Extraction

Within the feature space, the K-means algorithm was used to conduct the habitat imaging as follows:

1. K data points are randomly selected as the initial cluster centroids.

$$\mu_j^{(0)} = (A_j, V_j, D_j)$$

where  $A, V, D$  represent the enhancement mappings derived from arterial, venous, and delayed phases, respectively.

2. For each voxel  $x_i = (A_i, V_i, D_i)$  within the tumor region, the distance to each centroid was calculated and was then assigned to the nearest centroid.

$$c(i) = \arg \min_j \sqrt{(A_i - A_j)^2 + (V_i - V_j)^2 + (D_i - D_j)^2}$$

3. According to the assignment results, new cluster centroids were recalculated.

$$\mu_j = \left( \frac{1}{|C_j|} \sum_{i \in C_j} A_i, \frac{1}{|C_j|} \sum_{i \in C_j} V_i, \frac{1}{|C_j|} \sum_{i \in C_j} D_i \right)$$

where  $C_j$  is the set of all data in the j-th cluster, and  $|C_j|$  is the number of data points in the j-th cluster.

4. Repeat step 2 and 3 until a stopping criterion is met. During iteration, the objective function is to minimize the sum of distances from each data point to its cluster centroid.

$$\mathcal{J} = \sum_{i=1}^n \sum_{j=1}^K r_{ij} \left[ (A_i - A_j)^2 + (V_i - V_j)^2 + (D_i - D_j)^2 \right]$$

where  $r_{ij}$  is an indicator variable that is 1 if data point  $x_i$  is in cluster  $j$  and 0 otherwise.

Since the K-means algorithm was applied to the enhancement mappings which were derived from four original sequences, the sub-regions generated by the K-means clustering could match both three parametric mappings and Insights Imaging (2025) Shen JJ, Li Q, Li L, et al.

$T1_{Pre-contrast}$ ,  $T1_{Arterial}$ ,  $T1_{Venous}$ , and  $T1_{Delayed}$  phases. Subsequently, the enhance\_habitat features and original\_habitat features were extracted from these two groups of images, respectively. Additionally, as for the six original sequences, which encompass the previous four sequences along with DWI and T2 radiomics features were extracted to develop the radiomics model.

For each single ROI, a total of 2264 radiomics features were extracted utilizing uAI Research Portal (United Imaging Intelligence, China) including first-order (grayscale), second-order (shape), and texture features.

## Appendix S4

### Model Evaluation and evaluation

For clinical features, both univariate and multivariate logistic regression analyses were applied to select those features with a p-value of less than 0.05.

The logistic regression (LR) model typically allowed for relatively balanced performance across various datasets and are less prone to overfitting the training data. Therefore, the LR model was selected for conducting experiments. For the conventional radiomics model, the selected features from  $T1_{Pre}$ ,  $T1_{Arterial}$ ,  $T1_{Venous}$ ,  $T1_{Delayed}$ , DWI, and T2 models were further selected by LASSO. The same process was also applied on the original\_habitat and enhance\_habitat models. Combine these three radiomics models to form an image model and then together with clinical model to construct the final combined model.

The receiver operating characteristic (ROC) curve and the corresponding the area under the curve (AUC) were calculated quantitatively. Additionally, five parameters, including accuracy (ACC), sensitivity, specificity, precision, and F1-score were calculated to quantitatively evaluate the consistency between the actual label and predictive label.

**These five equations for model evaluations were defined as follows:**

$$ACC = \frac{TP + TN}{TP + FP + TN + FN}$$

$$Sensitivity = Recall = \frac{TP}{TP + FP}$$

$$Specificity = \frac{TN}{FP + TN}$$

$$Precision = \frac{TP}{TP + FP}$$

$$F1\ score = \frac{2 \times Precision \times Recall}{Precision + Recall}$$

**Table E1: Detailed parameters of MRI sequences in Center 1**

| Center                        | MRI                              | Parameters                                     | TR   | TE        | FOV     | Matrix  | Section thickness(mm) | Gap |
|-------------------------------|----------------------------------|------------------------------------------------|------|-----------|---------|---------|-----------------------|-----|
| Zhongshan Hospital (Center 1) | 1.5T MR (MAGNETOM Aera, Siemens) | T2-weighted imaging                            | 4918 | 106       | 285×380 | 384×273 | 5.5                   | 1.2 |
|                               |                                  | DWI <sup>a</sup>                               | 5100 | 55        | 285×380 | 192×154 | 5.5                   | 1.2 |
|                               |                                  | T1-weighted in-phase and opposed-phase imaging | 6.88 | 2.39/4.77 | 356×380 | 320×240 | 3.5                   | 0   |
|                               |                                  | Contrast-enhanced T1-weighted imaging          | 3.47 | 1.36      | 308×380 | 320×240 | 3                     | 0   |
|                               | 3.0T MR (Prisma, Siemens)        | T2-weighted imaging                            | 587  | 103       | 380×344 | 320×320 | 6                     | 1.2 |
|                               |                                  | DWI <sup>a</sup>                               | 5000 | 65        | 380×310 | 130×130 | 5                     | 1.2 |
|                               |                                  | T1-weighted in-phase and opposed-phase imaging | 3.97 | 1.29/2.52 | 380×285 | 320×288 | 3.0                   | 0   |
|                               |                                  | Contrast-enhanced T1-weighted imaging          | 3.10 | 1.23      | 380×309 | 320×288 | 3                     | 0   |

Note. — TR = Repetition time; TE = Echo time; FOV = Field of view;

DWI = Diffusion-weighted Imaging;

<sup>a</sup> performed with b values of 0 and 500 sec/mm<sup>2</sup>

**Table E2: Detailed parameters of MRI sequences in multi-centers**

| Center                                                | MRI                                     | Parameters                                     | TR    | TE      | FOV       | Matrix  | Section thickness(mm) | Gap |
|-------------------------------------------------------|-----------------------------------------|------------------------------------------------|-------|---------|-----------|---------|-----------------------|-----|
| Affiliated Hospital of Jiangnan University (Center 2) | GE MEDICAL SYSTEMS SIGNA Architect 3.0T | T2-weighted imaging                            | 10000 | 91.9    | 38×38     | 288×288 | 6.0                   | 2.0 |
|                                                       |                                         | DWI <sup>b</sup>                               | 8000  | 68.4    | 38×38     | 128×130 | 6.0                   | 2.0 |
|                                                       |                                         | T1-weighted in-phase and opposed-phase imaging | 4.8   | 2.2/1.1 | 38×30.4   | 288×224 | 2.5                   | 0   |
|                                                       |                                         | Contrast-enhanced T1-weighted imaging          | 4.8   | 1.7     | 38×30.4   | 288×224 | 2.6                   | 0   |
|                                                       | Philips Ingenia CX 3.0T                 | T2-weighted imaging                            | 22552 | 89.1    | 40×40     | 288×58  | 6.0                   | 1.0 |
|                                                       |                                         | DWI <sup>b</sup>                               | 14452 | 59.3    | 36.5×42.9 | 136×128 | 5.0                   | 1.5 |
|                                                       |                                         | T1-weighted in-phase and opposed-phase imaging | 3.63  | 2.4/1.2 | 40×31.4   | 236×194 | 2.0                   | 0   |
|                                                       |                                         | Contrast-enhanced T1-weighted imaging          | 3.23  | 0.0     | 40×35.2   | 268×251 | 2.0                   | 0   |
|                                                       |                                         |                                                |       |         |           |         |                       |     |

|                                                                            |                                    |                                                          |        |           |           |         |     |      |
|----------------------------------------------------------------------------|------------------------------------|----------------------------------------------------------|--------|-----------|-----------|---------|-----|------|
| The First Hospital<br>of Jiaxing (Center<br>3)                             | GE3.0T<br>Discovery MR750          | T2-weighted<br>imaging                                   | 12000  | 80.5      | 40×40     | 352×352 | 6.5 | 1.0  |
|                                                                            |                                    | DWI <sup>c</sup>                                         | 6666.7 | 47.4      | 40×40     | 128×128 | 6.5 | 1.0  |
|                                                                            |                                    | T1-weighted in-<br>phase and<br>opposed-phase<br>imaging | 4      | 2.29/1.12 | 40×40     | 320×320 | 5   | 2.5  |
|                                                                            |                                    | Contrast-<br>enhanced<br>T1-weighted<br>imaging          | 3.76   | 1.67      | 40×40     | 256×320 | 3   | 0    |
|                                                                            | Siemens<br>Area1.5T                | T2-weighted<br>imaging                                   | 8941.1 | 85.0      | 35×35     | 256×256 | 6   | 1.2  |
|                                                                            |                                    | DWI <sup>c</sup>                                         | 5200   | 67        | 29.7×38   | 240×384 | 7   | 1.4  |
|                                                                            |                                    | T1-weighted in-<br>phase and<br>opposed-phase<br>imaging | 200    | 4.9/2.4   | 31.0×38.1 | 182×320 | 6.5 | 1.3  |
|                                                                            |                                    | Contrast-<br>enhanced<br>T1-weighted<br>imaging          | 5.7    | 2.2       | 38×38     | 224×320 | 3   | 0    |
| First Affiliated<br>Hospital of Bengbu<br>Medical University<br>(Center 4) | Philips Ingenia<br>CX 3.0T PHILIPS | T2-weighted<br>imaging                                   | 1250   | 70        | 36.2×36.2 | 212×216 | 5   | 0.5  |
|                                                                            |                                    | DWI <sup>c</sup>                                         | 3000   | 59.3      | 37.5×37.5 | 132×161 | 6.5 | 3.25 |



|                                                |      |          |           |         |     |   |
|------------------------------------------------|------|----------|-----------|---------|-----|---|
| T1-weighted in-phase and opposed-phase imaging | 165  | 2.3/1.15 | 34.8×34.8 | 152×194 | 7   | 0 |
| Contrast-enhanced T1-weighted imaging          | 3.03 | 1.42     | 34.5×34.5 | 232×264 | 4.6 | 0 |

---

Note. — TR = Repetition time; TE = Echo time; FOV = Field of view;

DWI = Diffusion-weighted Imaging;

<sup>b</sup> performed with b values of 0, 50, 800 sec/mm<sup>2</sup>

<sup>c</sup> performed with b values of 0, 800 sec/mm<sup>2</sup>

**Table E3. The extracted radiomics features**

| Filter                | Firstorder | Gldm | Gldm | Gldm | Gldm | Gldm | Shape | Sum  |
|-----------------------|------------|------|------|------|------|------|-------|------|
| Additivegaussiannoise | 18         | 21   | 14   | 16   | 16   | 5    |       | 90   |
| Binomialblurimage     | 18         | 21   | 14   | 16   | 16   | 5    |       | 90   |
| Boxmean               | 18         | 21   | 14   | 16   | 16   | 5    |       | 90   |
| Boxsigmaimage         | 18         | 21   | 14   | 16   | 16   | 5    |       | 90   |
| Curvatureflow         | 18         | 21   | 14   | 16   | 16   | 5    |       | 90   |
| Discretegaussian      | 18         | 21   | 14   | 16   | 16   | 5    |       | 90   |
| Laplaciansharpening   | 18         | 21   | 14   | 16   | 16   | 5    |       | 90   |
| Log                   | 72         | 84   | 56   | 64   | 64   | 20   |       | 360  |
| Mean                  | 18         | 21   | 14   | 16   | 16   | 5    |       | 90   |
| Normalize             | 18         | 21   | 14   | 16   | 16   | 5    |       | 90   |
| Original              | 18         | 21   | 14   | 16   | 16   | 5    | 14    | 104  |
| Recursivegaussian     | 18         | 21   | 14   | 16   | 16   | 5    |       | 90   |
| Shotnoise             | 18         | 21   | 14   | 16   | 16   | 5    |       | 90   |
| Specklenoise          | 18         | 21   | 14   | 16   | 16   | 5    |       | 90   |
| Wavelet               | 144        | 168  | 112  | 128  | 128  | 40   |       | 720  |
| Sum                   | 450        | 525  | 350  | 400  | 400  | 125  | 14    | 2264 |

**Table E4. The extracted habitat features**

| Filter                | Firstorder | Gldm | Gldm | Gldm | Gldm | Gldm | Shape | Sum  |
|-----------------------|------------|------|------|------|------|------|-------|------|
| Additivegaussiannoise | 18         | 21   | 14   | 16   | 16   | 5    |       | 90   |
| Binomialblurimage     | 18         | 21   | 14   | 16   | 16   | 5    |       | 90   |
| Boxmean               | 18         | 21   | 14   | 16   | 16   | 5    |       | 90   |
| Boxsigmaimage         | 18         | 21   | 14   | 16   | 16   | 5    |       | 90   |
| Curvatureflow         | 18         | 21   | 14   | 16   | 16   | 5    |       | 90   |
| Discretegaussian      | 18         | 21   | 14   | 16   | 16   | 5    |       | 90   |
| Laplaciansharpening   | 18         | 21   | 14   | 16   | 16   | 5    |       | 90   |
| Mean                  | 18         | 21   | 14   | 16   | 16   | 5    |       | 90   |
| Normalize             | 18         | 21   | 14   | 16   | 16   | 5    |       | 90   |
| Original              | 18         | 21   | 14   | 16   | 16   | 5    | 14    | 104  |
| Recursivegaussian     | 18         | 21   | 14   | 16   | 16   | 5    |       | 90   |
| Shotnoise             | 18         | 21   | 14   | 16   | 16   | 5    |       | 90   |
| Specklenoise          | 18         | 21   | 14   | 16   | 16   | 5    |       | 90   |
| Wavelet               | 144        | 168  | 112  | 128  | 128  | 40   |       | 720  |
| Sum                   | 378        | 441  | 294  | 336  | 336  | 105  | 14    | 1904 |

**Table E5 Performance of Radiomics Models from Single Sequence**

| Models           | AUC(95% CI)        |                     | Sensitivity |                     | Specificity |                     | Accuracy   |                     | Precision  |                     | F1 Score   |                     |
|------------------|--------------------|---------------------|-------------|---------------------|-------------|---------------------|------------|---------------------|------------|---------------------|------------|---------------------|
|                  | Derivation         | Internal validation | Derivation  | Internal validation | Derivation  | Internal validation | Derivation | Internal validation | Derivation | Internal validation | Derivation | Internal validation |
| Radiomics_DWI    | 0.681(0.631-0.731) | 0.600(0.499-0.709)  | 0.753       | 0.638               | 0.451       | 0.581               | 0.581      | 0.606               | 0.509      | 0.536               | 0.607      | 0.583               |
| Radiomics_T2     | 0.613(0.566-0.667) | 0.674(0.573-0.776)  | 0.554       | 0.638               | 0.561       | 0.661               | 0.558      | 0.651               | 0.488      | 0.588               | 0.519      | 0.612               |
| Radiomics_T1_Pre | 0.638(0.585-0.69)  | 0.616(0.508-0.723)  | 0.398       | 0.447               | 0.756       | 0.742               | 0.602      | 0.615               | 0.552      | 0.568               | 0.462      | 0.5                 |
| Radiomics_T1_A   | 0.671(0.619-0.723) | 0.605(0.498-0.712)  | 0.758       | 0.766               | 0.459       | 0.452               | 0.588      | 0.587               | 0.515      | 0.514               | 0.613      | 0.615               |
| Radiomics_T1_V   | 0.668(0.617-0.719) | 0.617(0.509-0.725)  | 0.489       | 0.489               | 0.748       | 0.726               | 0.637      | 0.624               | 0.595      | 0.575               | 0.537      | 0.529               |
| Radiomics_T1_D   | 0.666(0.615-0.717) | 0.650(0.545-0.754)  | 0.774       | 0.766               | 0.451       | 0.484               | 0.59       | 0.606               | 0.516      | 0.529               | 0.619      | 0.626               |

**Table E6 Performance of Habitat Models from Different Sequence**

| Models           | AUC(95% CI)        |                     | Sensitivity |                     | Specificity |                     | Accuracy   |                     | Precision  |                     | F1 Score   |                     |
|------------------|--------------------|---------------------|-------------|---------------------|-------------|---------------------|------------|---------------------|------------|---------------------|------------|---------------------|
|                  | Derivation         | Internal validation | Derivation  | Internal validation | Derivation  | Internal validation | Derivation | Internal validation | Derivation | Internal validation | Derivation | Internal validation |
| Habitat_T1_Pre_1 | 0.677(0.627-0.728) | 0.589(0.479-0.698)  | 0.769       | 0.702               | 0.488       | 0.452               | 0.609      | 0.56                | 0.532      | 0.493               | 0.629      | 0.579               |
| Habitat_T1_A_1   | 0.686(0.635-0.736) | 0.553(0.444-0.662)  | 0.731       | 0.596               | 0.524       | 0.548               | 0.613      | 0.569               | 0.538      | 0.5                 | 0.62       | 0.544               |
| Habitat_T1_V_1   | 0.636(0.583-0.688) | 0.424(0.315-0.532)  | 0.651       | 0.404               | 0.541       | 0.452               | 0.588      | 0.431               | 0.517      | 0.358               | 0.576      | 0.38                |
| Habitat_T1_D_1   | 0.690(0.64-0.74)   | 0.447(0.337-0.558)  | 0.64        | 0.404               | 0.618       | 0.532               | 0.627      | 0.477               | 0.559      | 0.396               | 0.596      | 0.4                 |
| Habitat_T1_Pre_2 | 0.671(0.622-0.72)  | 0.504(0.395-0.61)   | 0.833       | 0.787               | 0.394       | 0.339               | 0.583      | 0.532               | 0.51       | 0.474               | 0.633      | 0.592               |
| Habitat_T1_A_2   | 0.595(0.543-0.647) | 0.496(0.387-0.601)  | 0.876       | 0.872               | 0.232       | 0.226               | 0.509      | 0.505               | 0.463      | 0.461               | 0.606      | 0.603               |
| Habitat_T1_V_2   | 0.622(0.57-0.673)  | 0.574(0.465-0.68)   | 0.849       | 0.851               | 0.329       | 0.29                | 0.553      | 0.532               | 0.489      | 0.476               | 0.621      | 0.611               |
| Habitat_T1_D_2   | 0.584(0.532-0.637) | 0.492(0.383-0.598)  | 0.823       | 0.809               | 0.285       | 0.258               | 0.516      | 0.495               | 0.465      | 0.452               | 0.594      | 0.58                |
| Habitat_T1_Pre_3 | 0.617(0.563-0.67)  | 0.532(0.423-0.642)  | 0.548       | 0.489               | 0.593       | 0.613               | 0.574      | 0.56                | 0.505      | 0.489               | 0.526      | 0.489               |
| Habitat_T1_A_3   | 0.595(0.544-0.649) | 0.436(0.327-0.545)  | 0.962       | 0.936               | 0.053       | 0.113               | 0.444      | 0.468               | 0.434      | 0.444               | 0.599      | 0.603               |
| Habitat_T1_V_3   | 0.648(0.596-0.701) | 0.643(0.534-0.748)  | 0.543       | 0.532               | 0.667       | 0.71                | 0.613      | 0.633               | 0.552      | 0.581               | 0.547      | 0.556               |
| Habitat_T1_D_3   | 0.608(0.555-0.661) | 0.540(0.431-0.651)  | 0.581       | 0.574               | 0.606       | 0.548               | 0.595      | 0.56                | 0.527      | 0.491               | 0.552      | 0.529               |

|                      |                    |                    |       |       |       |       |       |       |       |       |       |       |
|----------------------|--------------------|--------------------|-------|-------|-------|-------|-------|-------|-------|-------|-------|-------|
| Habitat_Enhanced_A_1 | 0.539(0.485-0.593) | 0.554(0.445-0.662) | 0.866 | 0.872 | 0.183 | 0.274 | 0.477 | 0.532 | 0.445 | 0.477 | 0.588 | 0.617 |
| Habitat_Enhanced_V_1 | 0.659(0.608-0.71)  | 0.554(0.445-0.663) | 0.984 | 1     | 0.065 | 0.145 | 0.461 | 0.514 | 0.443 | 0.47  | 0.611 | 0.639 |
| Habitat_Enhanced_D_1 | 0.663(0.611-0.715) | 0.653(0.55-0.756)  | 0.651 | 0.617 | 0.606 | 0.629 | 0.625 | 0.624 | 0.555 | 0.558 | 0.599 | 0.586 |
| Habitat_Enhanced_A_2 | 0.558(0.505-0.611) | 0.532(0.425-0.639) | 0.349 | 0.723 | 0.703 | 0.355 | 0.551 | 0.514 | 0.471 | 0.459 | 0.401 | 0.562 |
| Habitat_Enhanced_V_2 | 0.548(0.495-0.601) | 0.544(0.435-0.653) | 0.339 | 0.255 | 0.687 | 0.839 | 0.537 | 0.587 | 0.45  | 0.545 | 0.387 | 0.348 |
| Habitat_Enhanced_D_2 | 0.584(0.532-0.636) | 0.572(0.466-0.678) | 0.247 | 0.298 | 0.789 | 0.806 | 0.556 | 0.587 | 0.469 | 0.538 | 0.324 | 0.384 |
| Habitat_Enhanced_A_3 | 0.554(0.509-0.609) | 0.576(0.467-0.686) | 0.559 | 0.574 | 0.508 | 0.581 | 0.53  | 0.578 | 0.462 | 0.509 | 0.506 | 0.54  |
| Habitat_Enhanced_V_3 | 0.667(0.615-0.719) | 0.507(0.397-0.617) | 0.274 | 0.17  | 0.898 | 0.903 | 0.63  | 0.587 | 0.671 | 0.571 | 0.389 | 0.262 |
| Habitat_Enhanced_D_3 | 0.592(0.537-0.647) | 0.536(0.426-0.645) | 0.774 | 0.787 | 0.309 | 0.371 | 0.509 | 0.55  | 0.459 | 0.487 | 0.576 | 0.602 |

**Table E7 Performance comparison between different models**

|                                      | Derivation<br>cohort   | Internal<br>validation<br>cohort | External<br>validation<br>cohort |
|--------------------------------------|------------------------|----------------------------------|----------------------------------|
| Models                               | AUC <i>P</i><br>value* | AUC <i>P</i><br>value*           | AUC <i>P</i><br>value*           |
| Radiomics vs Original_habitat        | 0.883                  | 0.883                            | 0.234                            |
| Radiomics vs Enhanced_habitat        | 0.646                  | 0.752                            | 0.405                            |
| Radiomics vs Habitat                 | 0.260                  | 0.624                            | 0.126                            |
| Radiomics vs Clinical                | 0.298                  | 0.966                            | 0.743                            |
| Radiomics vs RH                      | 0.002                  | 0.258                            | 0.239                            |
| Radiomics vs RHC                     | <0.001                 | 0.045                            | 0.026                            |
| Original_habitat vs Enhanced_habitat | 0.502                  | 0.857                            | 0.799                            |
| Original_habitat vs Habitat          | 0.069                  | 0.270                            | 0.746                            |
| Original_habitat vs Clinical         | 0.214                  | 0.925                            | 0.453                            |
| Original_habitat vs RH               | 0.003                  | 0.165                            | 0.618                            |
| Original_habitat vs RHC              | <0.001                 | 0.026                            | 0.518                            |
| Enhanced_habitat vs Habitat          | 0.006                  | 0.248                            | 0.475                            |
| Enhanced_habitat vs Clinical         | 0.531                  | 0.798                            | 0.577                            |
| Enhanced_habitat vs RH               | <0.001                 | 0.139                            | 0.871                            |
| Enhanced_habitat vs RHC              | <0.001                 | 0.022                            | 0.373                            |
| Habitat vs Clinical                  | 0.027                  | 0.634                            | 0.299                            |
| Habitat vs RH                        | 0.024                  | 0.410                            | 0.201                            |
| Habitat vs RHC                       | <0.001                 | 0.081                            | 0.575                            |
| Clinical vs RH                       | <0.001                 | 0.409                            | 0.690                            |
| Clinical vs RHC                      | <0.001                 | 0.041                            | 0.134                            |
| RH vs RHC                            | <0.001                 | 0.136                            | 0.018                            |

\*The DeLong test was employed to compare the AUCs of the various models.

**Table E8 The Detailed Features Description**

| Feature ID | Feature description                                               |
|------------|-------------------------------------------------------------------|
| F1         | Imaging-enlarged_Lymph_Nodes                                      |
| F2         | TB_class                                                          |
| F3         | CA199_class                                                       |
| F4         | Enhance_D_1_binomialblurimage_ngtdm_Contrast                      |
| F5         | Enhance_D_1_normalize_firstorder_InterquartileRange               |
| F6         | Enhance_D_1_normalize_firstorder_Median                           |
| F7         | Enhance_D_1_laplaciansharpening_glcml_InverseVariance             |
| F8         | T2_boxsigmainimage_glcml_InverseVariance                          |
| F9         | T1_D_boxmean_glcml_lrn                                            |
| F10        | T1_D_wavelet_firstorder_wavelet-HHL-Median                        |
| F11        | T1_D_wavelet_gldm_wavelet-LLL-SmallDependenceLowGrayLevelEmphasis |
| F12        | T1_V_2_wavelet_firstorder_wavelet-LHH-InterquartileRange          |
| F13        | T1_V_2_wavelet_glcml_wavelet-LHH-DifferenceAverage                |
| F14        | T1_V_3_normalize_firstorder_Minimum                               |
| F15        | T1_V_3_normalize_glszm_SmallAreaLowGrayLevelEmphasis              |
| F16        | T1_Pre_1_boxsigmainimage_firstorder_Kurtosis                      |
| F17        | T1_Pre_1_wavelet_glszm_wavelet-HHH-GrayLevelVariance              |
| F18        | T1_Pre_1_normalize_glrml_ShortRunLowGrayLevelEmphasis             |



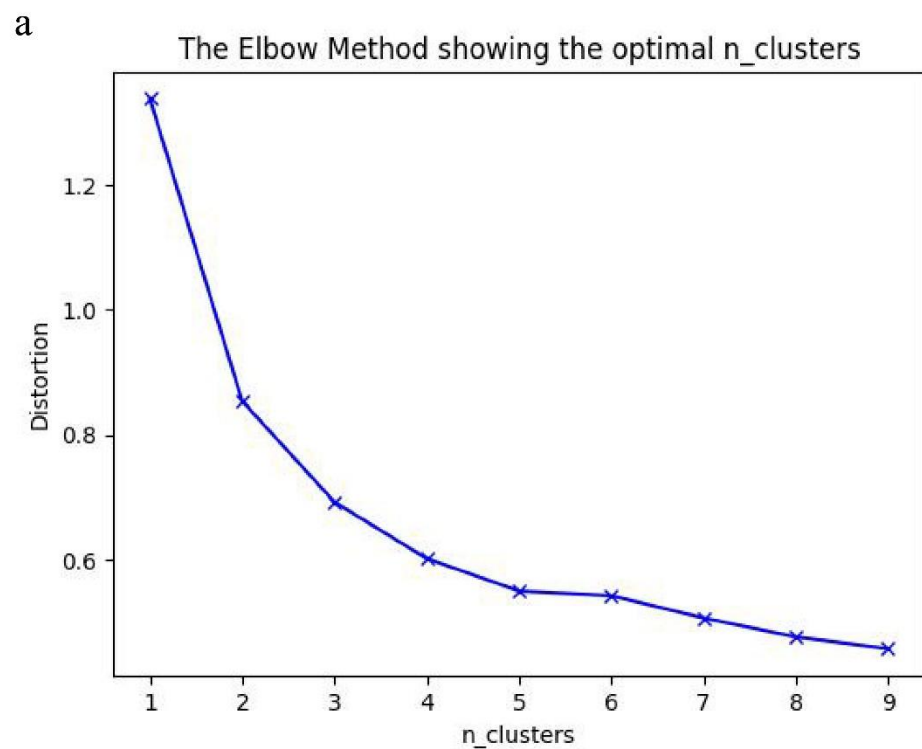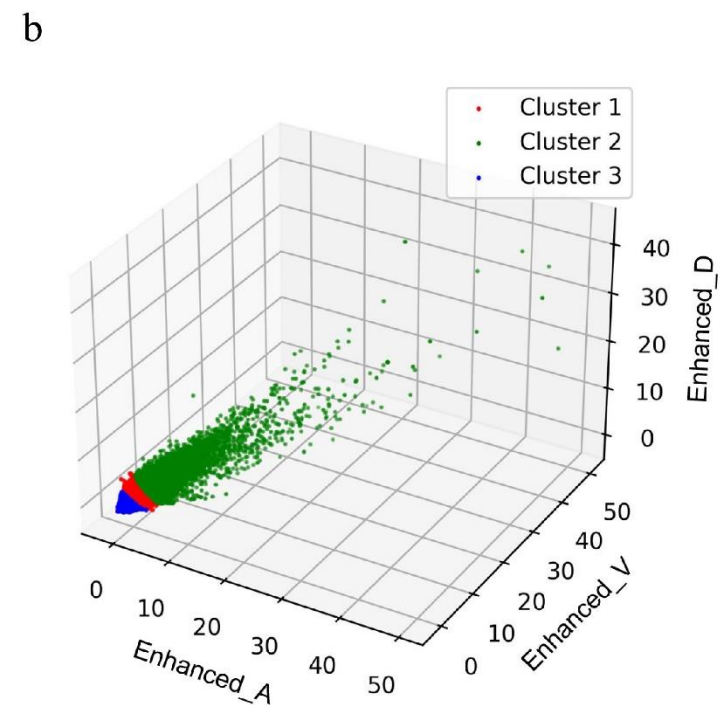

**Figure E1** Habitat clustering results. (a) Calinski–Harabasz score line chart and (b) scatter plot of clustering analysis on enhancement ratio mapping.



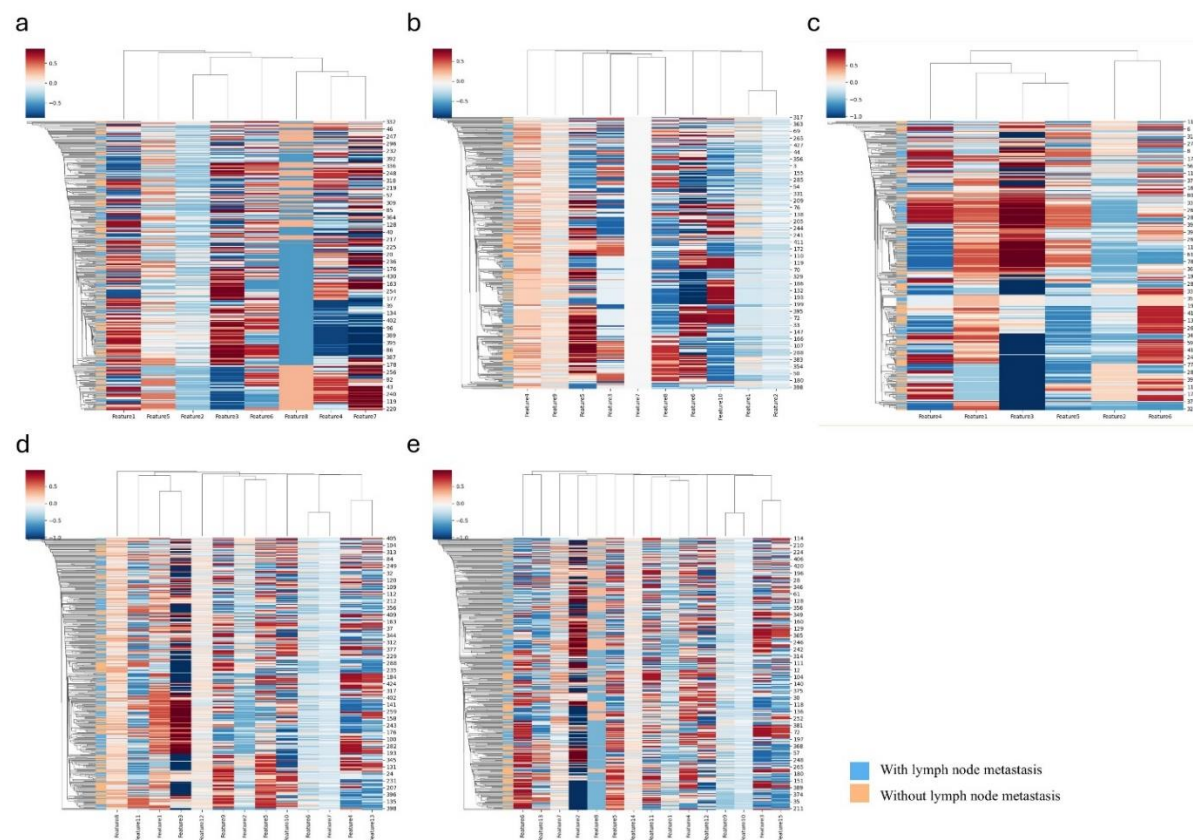

**Figure E3.** Clustering analysis for key radiomics and habitat features. Hierarchical clustering heatmap for key (a) radiomics features, (b) origin habitat features, (c) enhanced habitat features, (d) habitat features, and (e) radiomics-habitat (RH) features in the derivation cohort. The x-axis represents the IDs of radiomics and habitat features, and the y-axis represents patients. Patients belong to the same cluster (adjacent rows) share similar features in the Euclidean space. The status of lymph node metastasis (LNM) is displayed on the blue-orange bar located on the left side next to the y-axis.

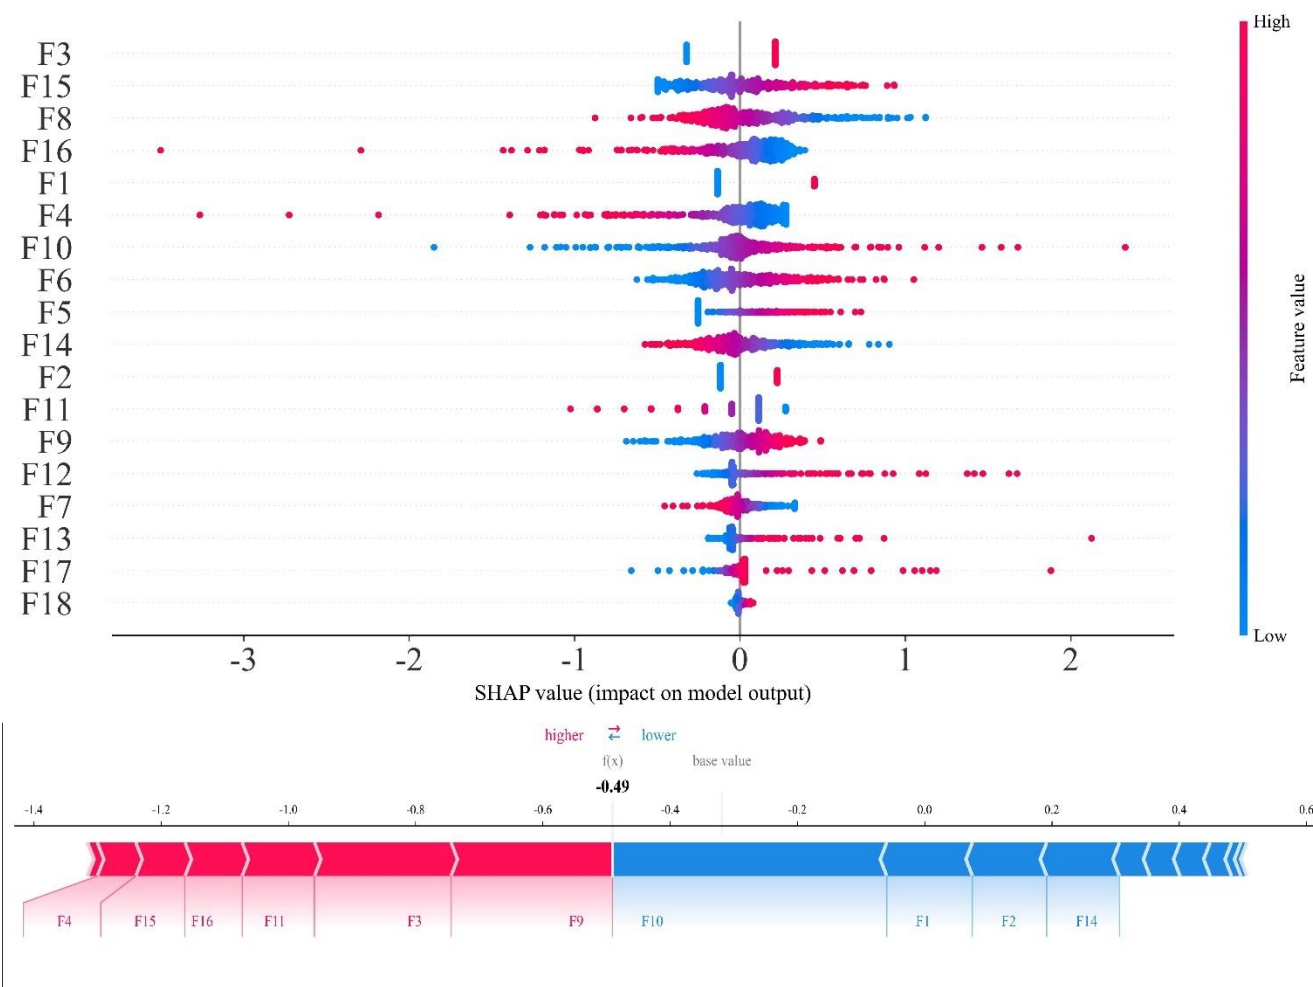

**Figure E4.** The SHapley Additive exPlanations (SHAP) for the RHC model.
